# Supplementary material for: Ferroptosis-Related Prognostic Gene LAMP2 Is a Potential Biomarker Differential Expressed in Castration Resistant Prostate Cancer
Source: Hindawi journal article supplement (doi:10.1155/2023/8295113), 2023-01-20

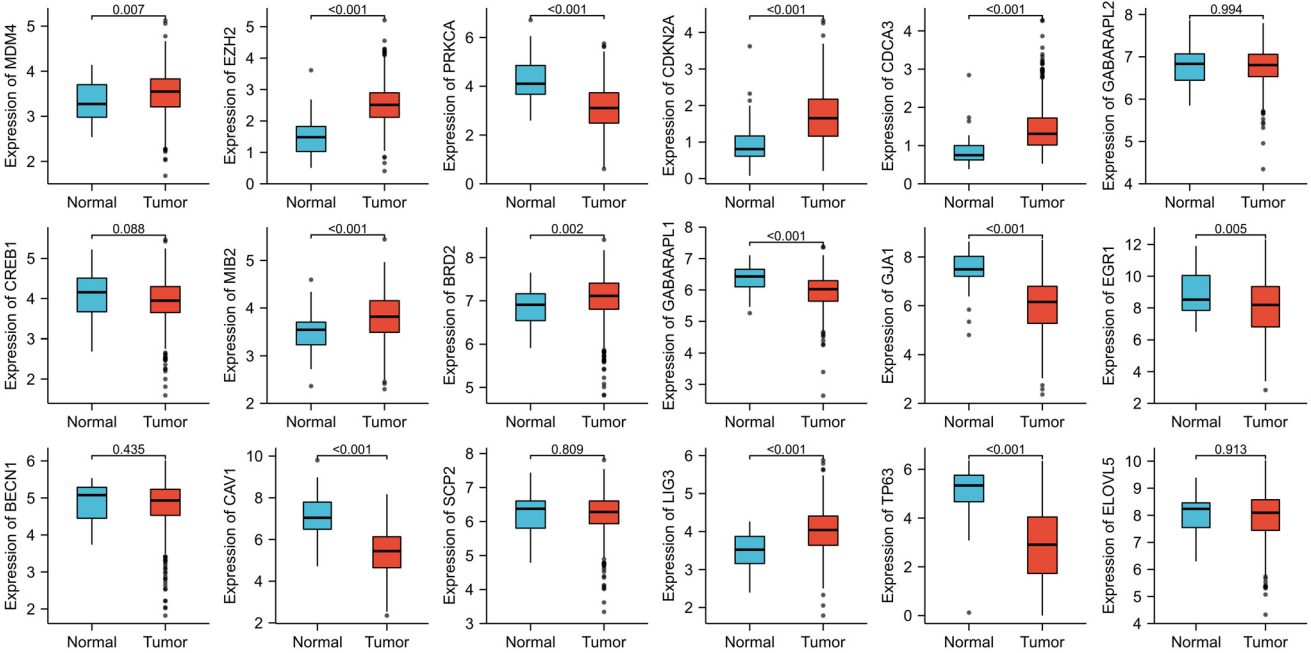

Supplement: f1 [file 8295113.f1.pdf]
